# Supplementary material
Source: PubMed Central journal article supplement (PMC7339285)
Supplement: ajcr0010-1668-f11.pdf [file ajcr0010-1668-f11.pdf]

## Virtual screening of Src inhibitor

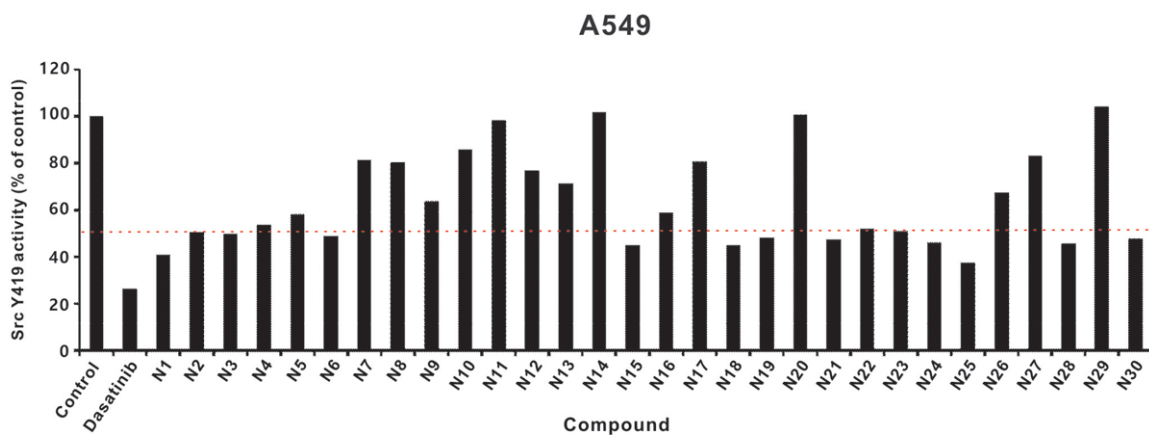

**Figure S1.** Evaluation of 30 NCI compounds by investigating their suppressive effect on Src activity. An ELISA experiment was performed in the A549 lung cancer cell line. The results are shown as the percentages of the control response (0  $\mu$ M, 0.1% DMSO). The red dashed line indicates the 50% inhibitory rate of Src phosphorylation. Each treatment was independently performed at a 1  $\mu$ M concentration. Dasatinib-treated cells served as a positive control.
